# Supplementary material
Source: Springer Nature journal article supplement (https://www.springermedizin.de/resource/supplementary/12883_2010_400_MOESM3_ESM.pdf/9455064)

L-NMMA ( $\mu\text{mol}\cdot\text{min}^{-1}\cdot\text{dL}^{-1}$  forearm)

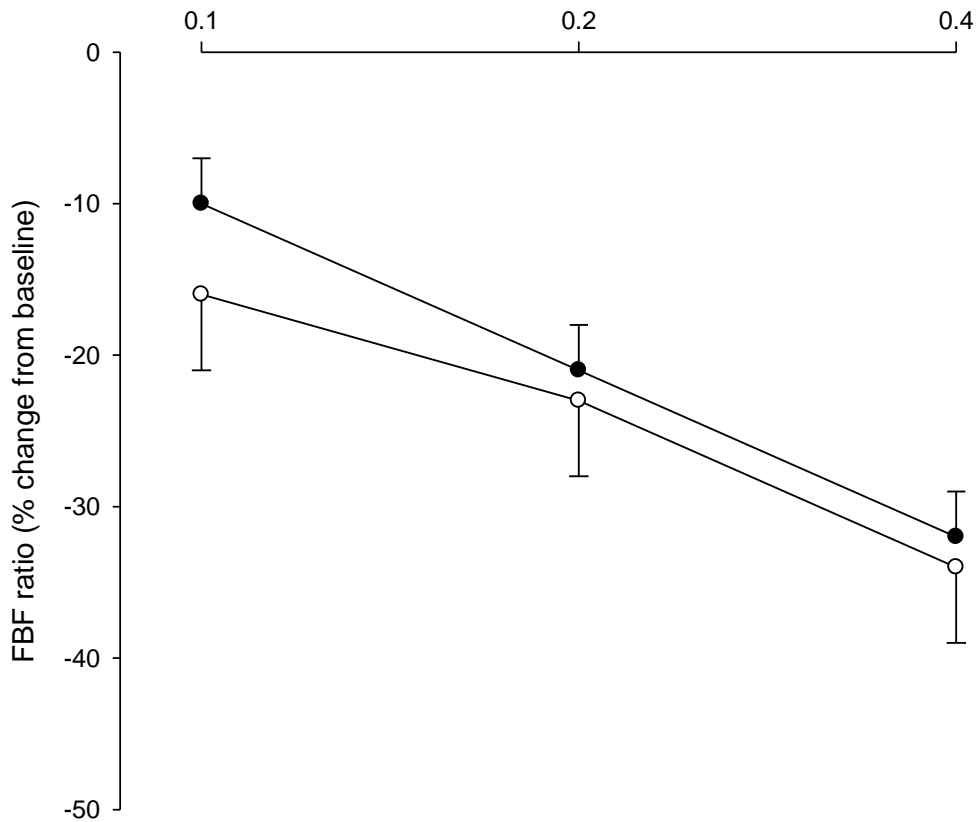

Supplement: MOESM3 [file 9455064]
